# Supplementary material for: Comprehensive Performance Assessment and Mechanistic Insights into Zero-Valent Iron/Ferrous Hydroxide Complex Composites for Optimized Se(IV) Sequestration in Aqueous Media
Source: Research Square preprint supplement (doi:10.21203/rs.3.rs-7734481/v1), 2025-10-15
Supplement: Supplementary file 1 [file 43d5c5979a237f834b56eb76.docx]

**Supporting Information for**

**Comprehensive Performance Assessment and Mechanistic Insights into Zero-Valent Iron/Ferrous Hydroxide Complex Composites for Optimized Se(IV) Sequestration in Aqueous Media**

Yanjun Du, Qing Zhou, Jiankun Zhao, Hexi Wu, Xiaoyan Li*, Yibao Liu*, Zhanggao Le*

*School of Nuclear Science and Engineering, East China University of Technology, Nanchang 330013, Jiangxi, China.*

*Corresponding author:

Email: lxy@ecut.edu.cn (X. Li); [Tel:+86-0791-83](Tel:+86-0791-86313701)839619.

Email: [ybliu@](mailto:tangjun@scu.edu.cn)ecut.edu.cn (Y. Liu); [Tel:+86-0791-83](Tel:+86-0791-86313701)837662.

Email: [zhgle@](mailto:tangjun@scu.edu.cn)ecut.edu.cn (Z. Le); [Tel:+86-0791-83](Tel:+86-0791-86313701)902385.

**1 Characterization methods**

Scanning electron microscopy (SEM) images were taken on a Zeiss SIGMA 300 system. Fourier transform infrared (FT-IR) spectra were obtained from a Fourier transform infrared spectrometer (Nicolet iS20). Thermogravimetric analysis (TGA) was performed on NETZSCH STA 449C under nitrogen flow from 20 °C to 800 °C. BET specific area measurements were performed using the Micromeritics ASAP 2460 instrument at 77 K. Zeta potentials were measured using a Stabino PMX 400 Zeta potentiometer at 25 °C. X-ray diffraction (XRD) patterns were obtained using a powder X-ray diffraction instrument (D8 ADVANCE). Chemical compositions of samples were analyzed using X-ray photoelectron spectroscopy (XPS, Thermo Escalab 250 electron spectrometer).

**2 Removal experiments**

Accurately measured 25 mL of Se(IV) solution with a certain concentration into a 100 mL conical flask, adjusted the pH of the solution with dilute HCl and NaOH solution. Then added a certain amount of Fe0, FHC or Fe0/FHC. At a certain temperature and after a certain reaction time, the solution was transferred to a centrifuge tube, centrifuged for 2 min at 4000 r min-1.Next step, the supernatant was taken to determine the concentration of Se(IV) using inductively coupled plasma optical emission spectroscopy (ICP-OES). Calculated the removal rate *R*(%) and adsorption capacity Qe (mg g-1) of Se(IV) according to Formula (S1) and (S2).

where *C*0 (mg L-1) was the initial selenium concentration and *C*e (mg L-1) was the selenium concentration at adsorption equilibrium, *V* (L) was the volume of selenium solution and *M* (g) was the dosage of Fe0/FHC.

A data average was calculated based on the experimental results of three static adsorption experiments in order to avoid experimental error.

**3 Kinetics models**

In order to explore the control mechanism of time on adsorption performance, we used pseudo-first-order and pseudo-second-order kineticsmodels for simulation. The linear equations of the two models are as follows:

In the formula, K1(min-1) and K2(g mg-1 min-1) were adsorption rate constants in quasi primary, quasi secondary adsorption kinetic models, which can be obtained from the slope and intercept of the straight line.

**4 Isotherm models**

In order to further clarify the adsorption mechanism of Se(IV) by Fe0/FHC, Langmuir isotherm and Freundlich isotherm adsorption model were used to fit the experimental data. Langmuir adsorption equation assumes that the adsorption is monolayer uniform adsorption and each adsorption site can only accommodate one adsorbate molecule. Its linear expression is:

In the formula, KL is a parameter related to the adsorption energy. The higher the value is, the greater the adsorption affinity is; Qm is monolayer adsorption energy, mg g-1.

Freundlich isotherm model assumed that the adsorbent surface is not single and the adsorption sites are not uniform. The linear expression of its isotherm model is :

Where, KF, n were these parameters related to adsorption capacity and adsorption strength.

**5 Thermodynamic models**

Adsorption heat is an important basis for determining whether the adsorption process is chemical or physical adsorption. It is the result of the interaction of various forces between adsorbate and adsorbent. By measuring the adsorption heat of Se(IV) on Fe0/FHC, the main force and mechanism of the reaction can be reflected. The calculation formulas on Gibbs free energy change (ΔG, kJ mol-1), enthalpy change (ΔH, kJ mol-1) and entropy change ΔS (J K-1 mol-1) are as follows:

Where, Kd is the adsorption distribution coefficient, L g-1; R is the ideal gas constant, 8.314 J mol-1 K-1; T is the thermodynamic temperature, K.
