# Supplementary material for: Comprehensive Performance Assessment and Mechanistic Insights into Zero-Valent Iron/Ferrous Hydroxide Complex Composites for Optimized Se(IV) Sequestration in Aqueous Media
Source: Research Square preprint supplement (doi:10.21203/rs.3.rs-7734481/v1), 2025-10-15
Supplement: Supplementary file 2 [file 8d7f5ab07eebd50c35c93fe6.docx]

**Highlights**

1. Fe0/FHC composite materials have unique advantages, such as easy preparation, good stability, high reduction efficiency, and excellent adsorption performance.
2. The maximum adsorption capacity of Fe0/FHC for Se(IV) was 201.62 mg g-1, which was higher than those of most existing adsorbents.
3. The removal process of Se(IV) by Fe0/FHC exhibited a dual effect, which was a combination of adsorption and reduction.
