# Supplementary figures and images for: Comprehensive Performance Assessment and Mechanistic Insights into Zero-Valent Iron/Ferrous Hydroxide Complex Composites for Optimized Se(IV) Sequestration in Aqueous Media
Source: Research Square preprint supplement (doi:10.21203/rs.3.rs-7734481/v1), 2025-10-15

**Graphical Abstract (for review)**


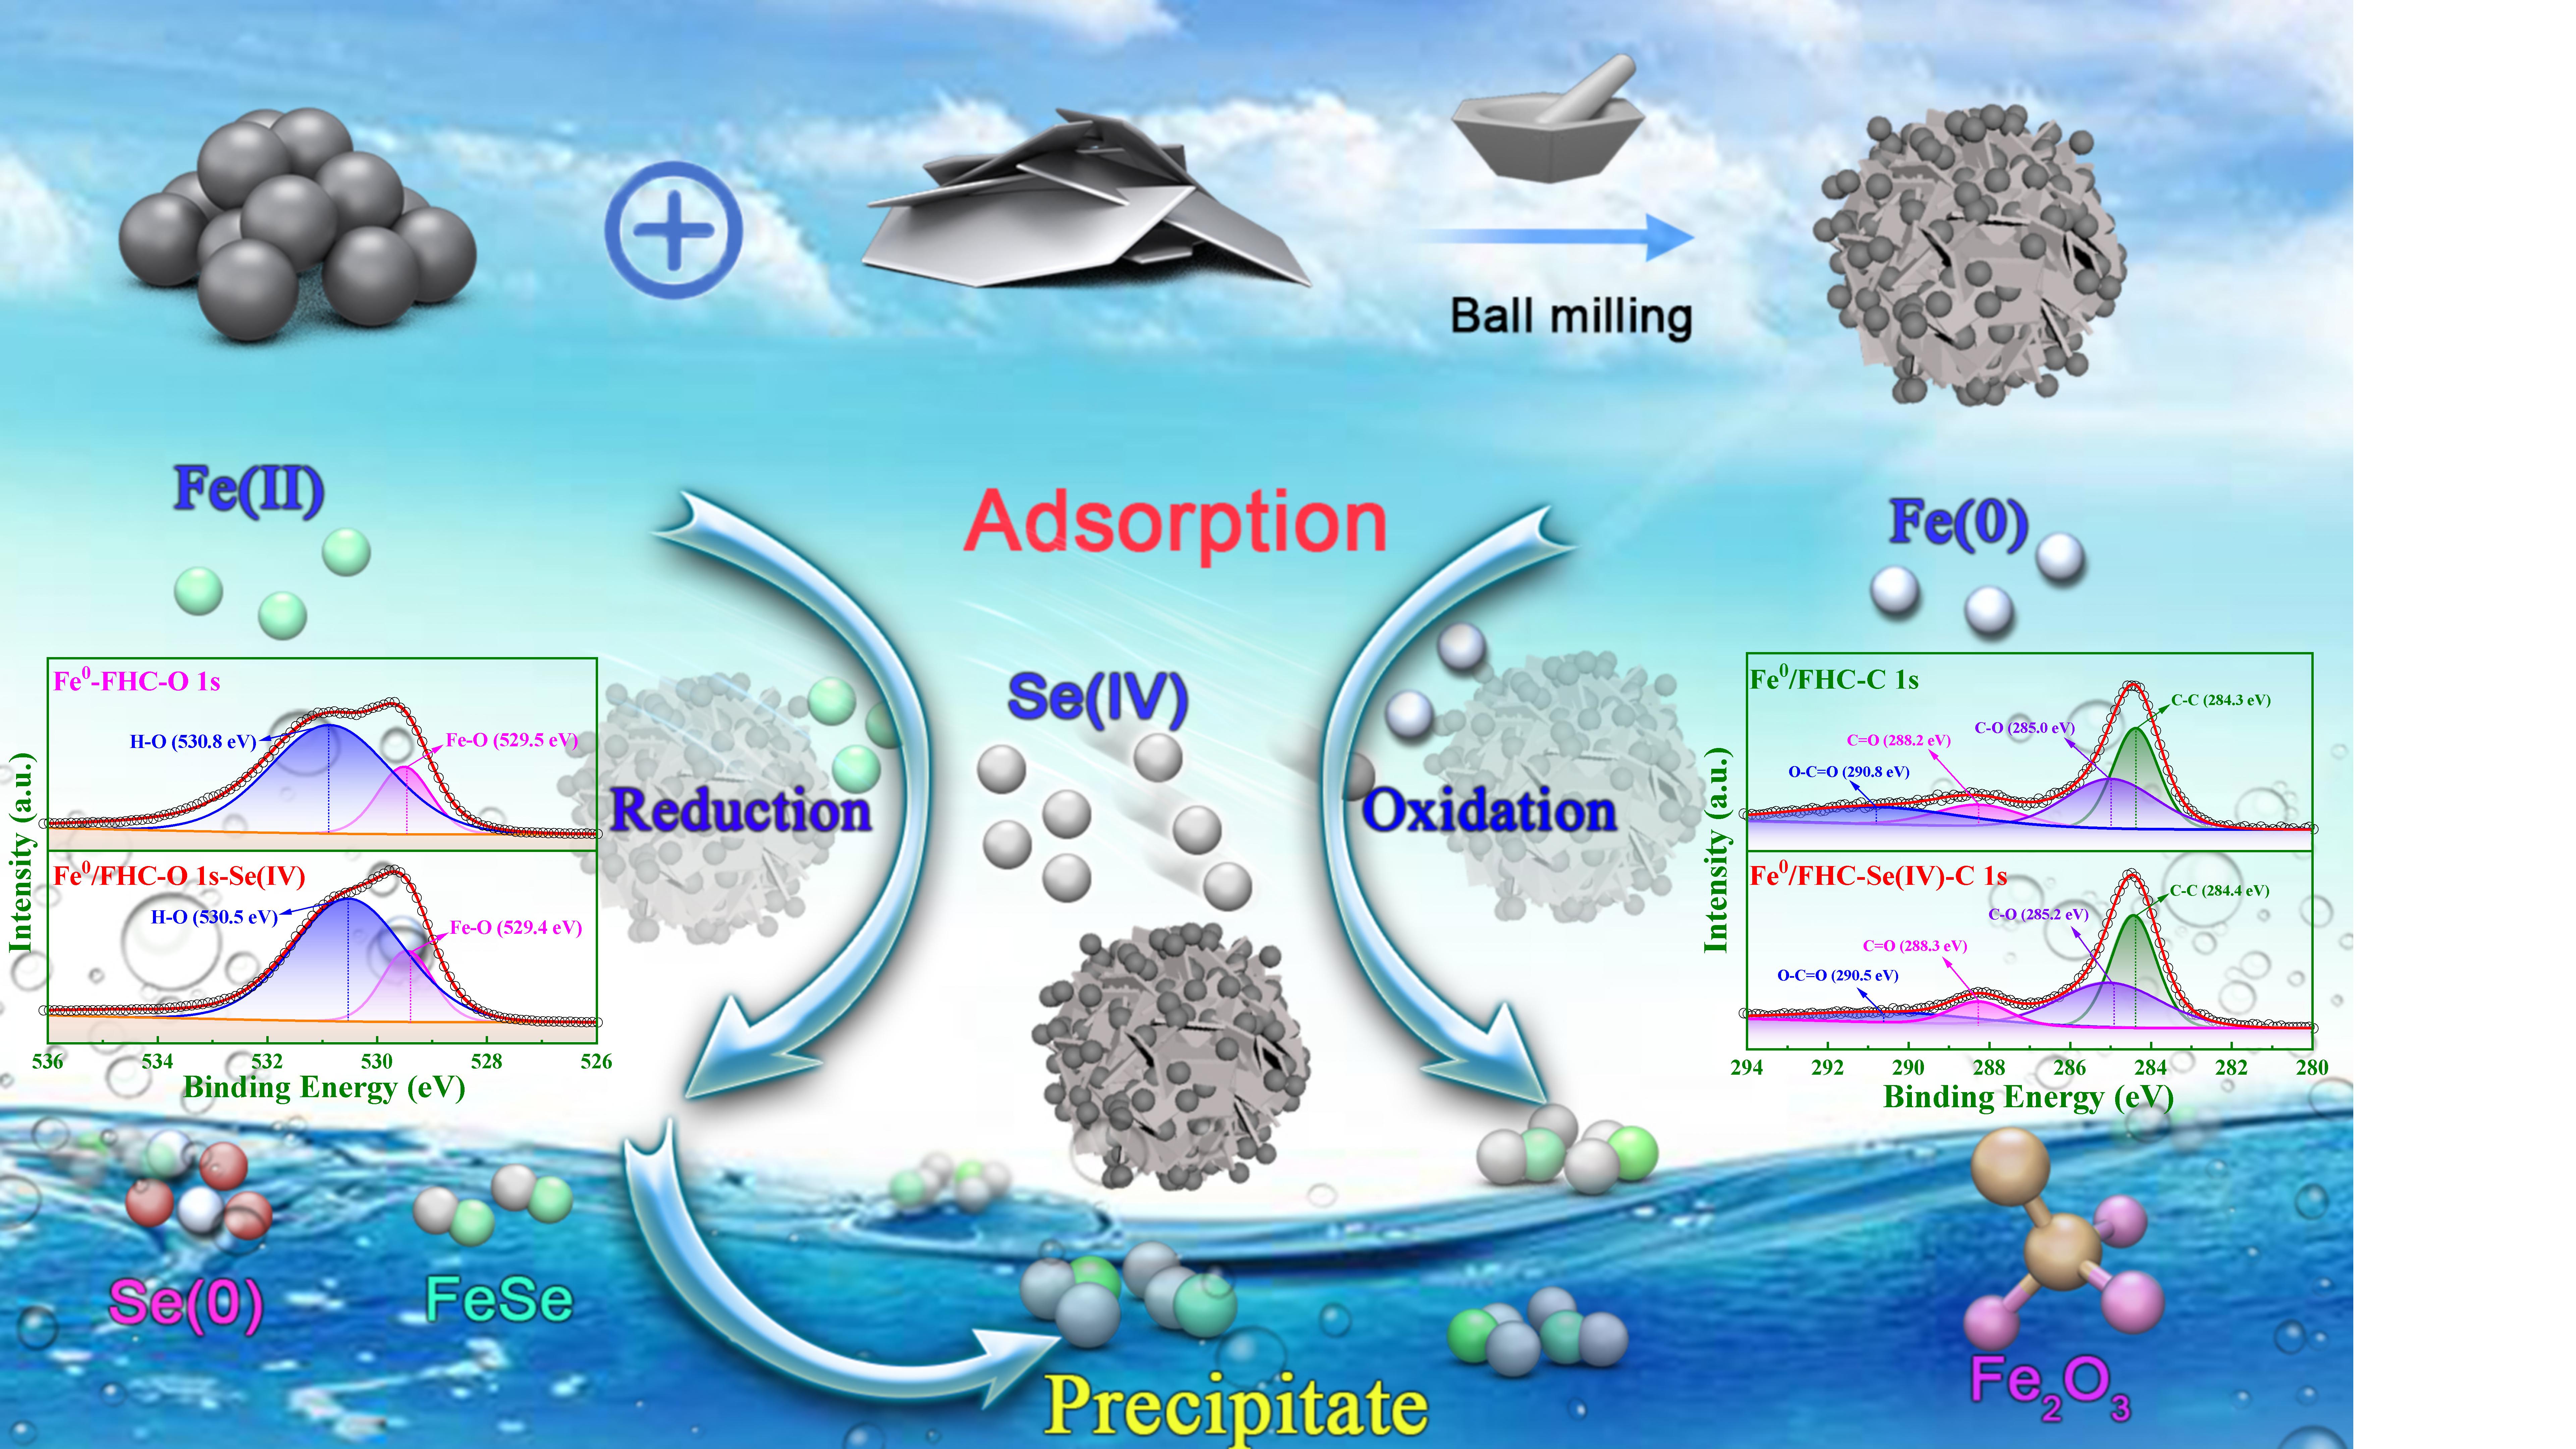

Supplement: Supplementary file 3 [file bb81a49c6b43e2378d7a19c0.docx]
